# Supplementary material
Source: PubMed Central journal article supplement (PMC6816634)
Supplement: 12195_2017_502_MOESM2_ESM.pdf [file 12195_2017_502_MOESM2_ESM.pdf]

# SUPPLEMENTARY MATERIAL

## Microfibrous Scaffolds Enhance Endothelial Differentiation and Organization of Induced Pluripotent Stem Cells

Joseph J. Kim <sup>1,2#</sup>, Luqia Hou <sup>1,2#</sup>, Guang Yang<sup>1,2#</sup>, Nicholas P. Mezak <sup>2</sup>, Maureen Wanjare <sup>1,2</sup>, Lydia M. Joubert<sup>3</sup>, and Ngan F. Huang <sup>1,2,4 \*</sup>

<sup>1</sup> Stanford Cardiovascular Institute, Stanford University, Stanford, CA, USA

<sup>2</sup> Center for Tissue Regeneration, Repair and Restoration, Veterans Affairs Palo Alto Health Care System, Palo Alto, CA, USA

<sup>3</sup> Cell Sciences Imaging Facility, Stanford University Medical School, Stanford, CA, USA

<sup>4</sup> Department of Cardiothoracic Surgery, Stanford University, Stanford, CA, USA

# contributed equally to this work

### \* Address for Correspondence:

Ngan F. Huang, PhD

Assistant Professor

Department of Cardiothoracic Surgery

Stanford University

Address: 300 Pasteur Drive, Stanford, CA 94305-5407

Tel: (650) 849-0559

Fax: (650) 725-3846

Email: ngantina@stanford.edu

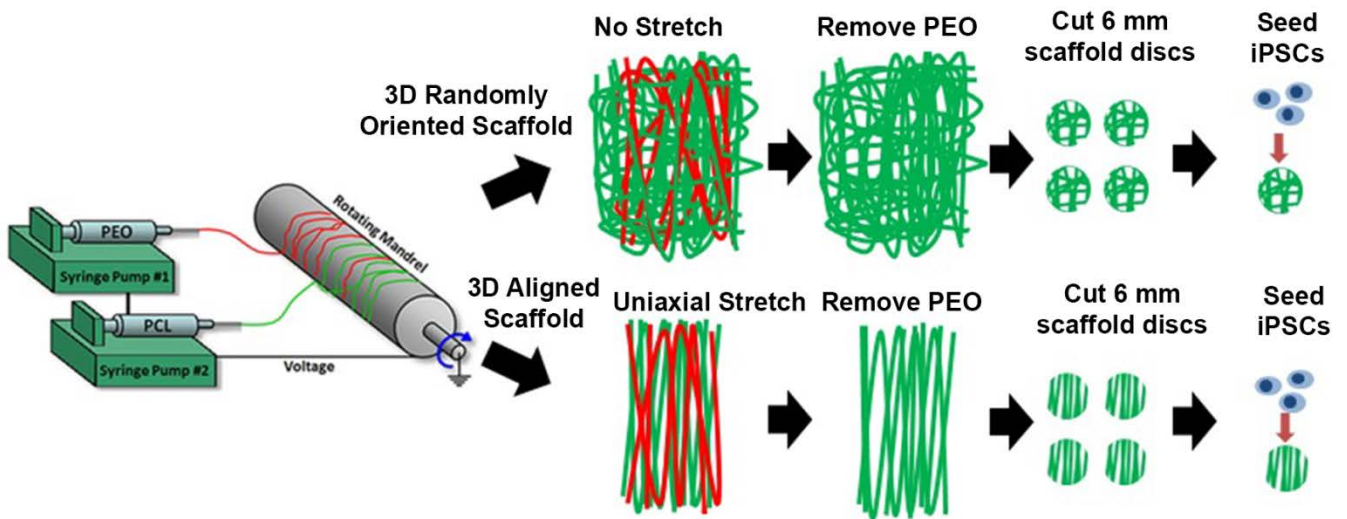

**Supplementary Fig. 1.** Schematic overview of PCL scaffold fabrication into randomly oriented or aligned microfibrous scaffolds.

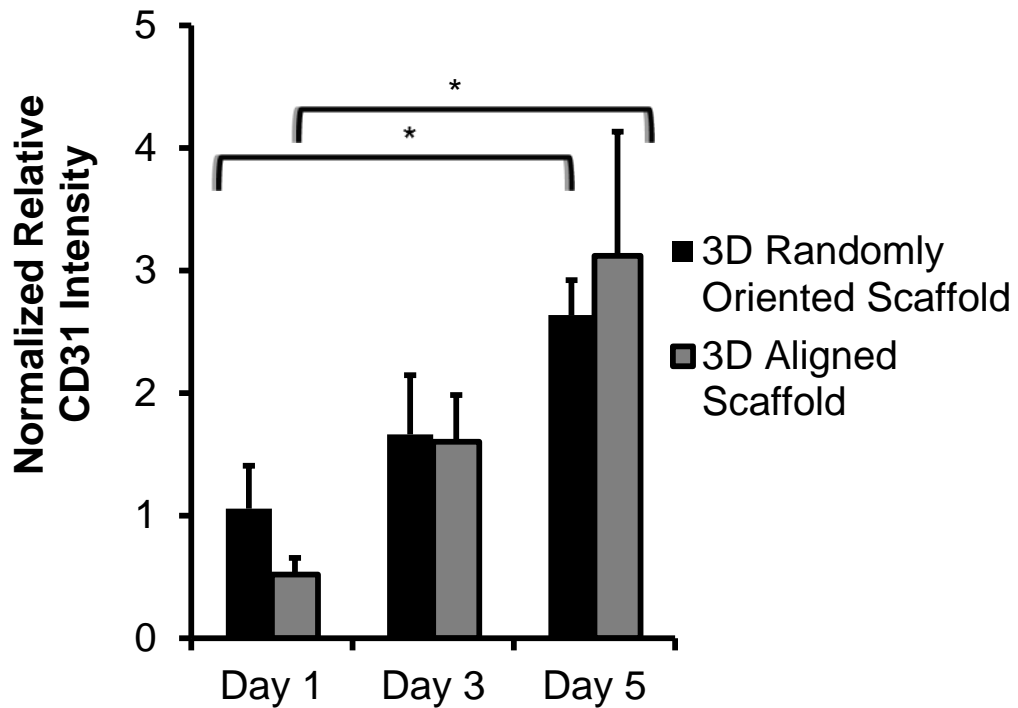

**Supplementary Fig. 2. Endothelial differentiation time course.** Shown is the normalized relative CD31 intensity in 3D randomly oriented or aligned scaffolds. CD31 intensity was normalized to total nuclei (n=3).
